# Supplementary material for: 89Zr-labeled CEA-targeted IL-2 variant immunocytokine in patients with solid tumors: CEA-mediated tumor accumulation and role of IL-2 receptor-binding
Source: PubMed Central journal article supplement (PMC5973872; doi:10.18632/oncotarget.25343), 2018-05-15
Supplement: oncotarget-09-24737-s001.pdf [file oncotarget-09-24737-s001.pdf]

## <sup>89</sup>Zr-labeled CEA- targeted IL-2 variant immunocytokine in patients with solid tumors: CEA- mediated tumor accumulation and role of IL-2 receptor-binding

### SUPPLEMENTARY MATERIALS

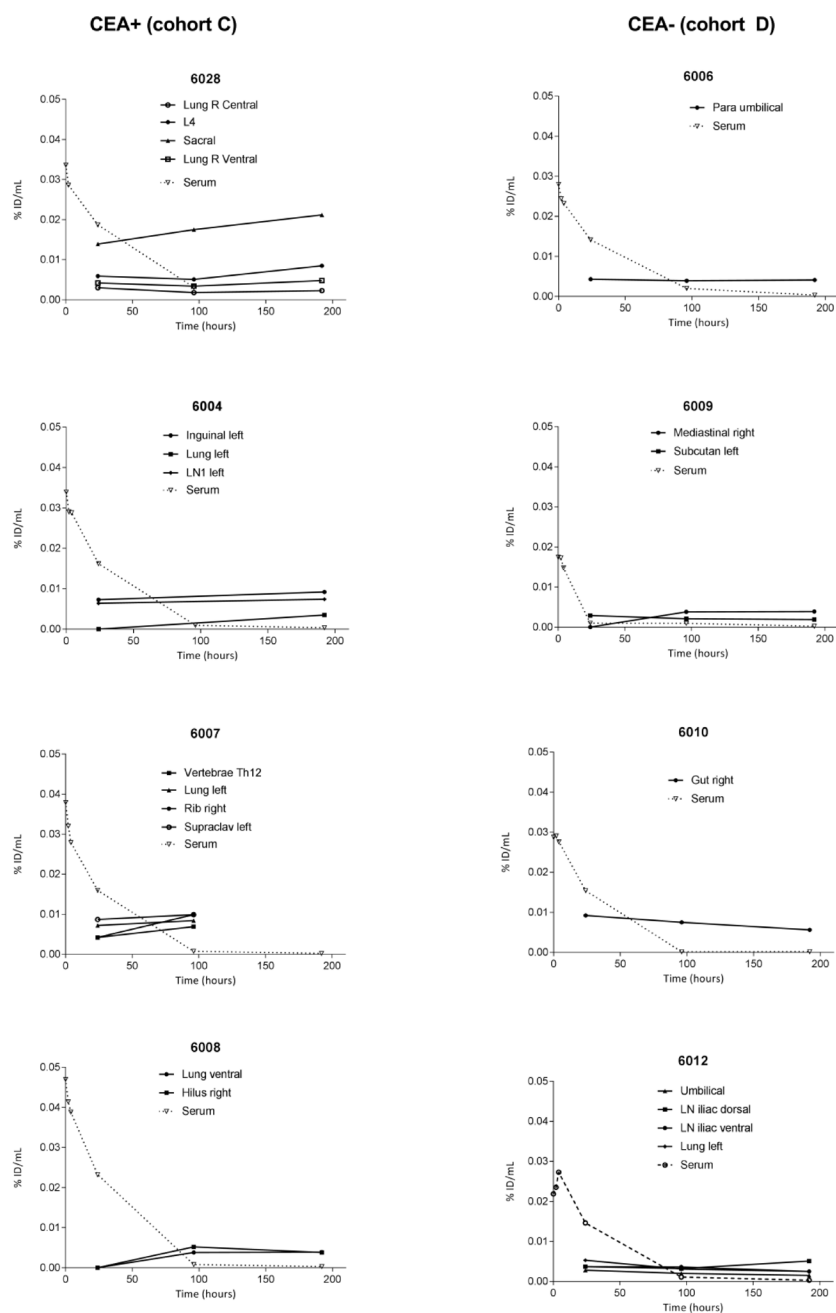

**Supplementary Figure 1:** <sup>89</sup>Zr-CEA- IL2v tumor uptake and serum levels of over time in CEA+ and CEA- patients treated with 30 mg. Data for individual patients from cohort C (CEA+; n = 4) and cohort D (CEA-; n = 4); tumor accumulation (solid lines) is %ID/mL<sub>peak</sub> and serum pools (dashed line) is %ID/mL.

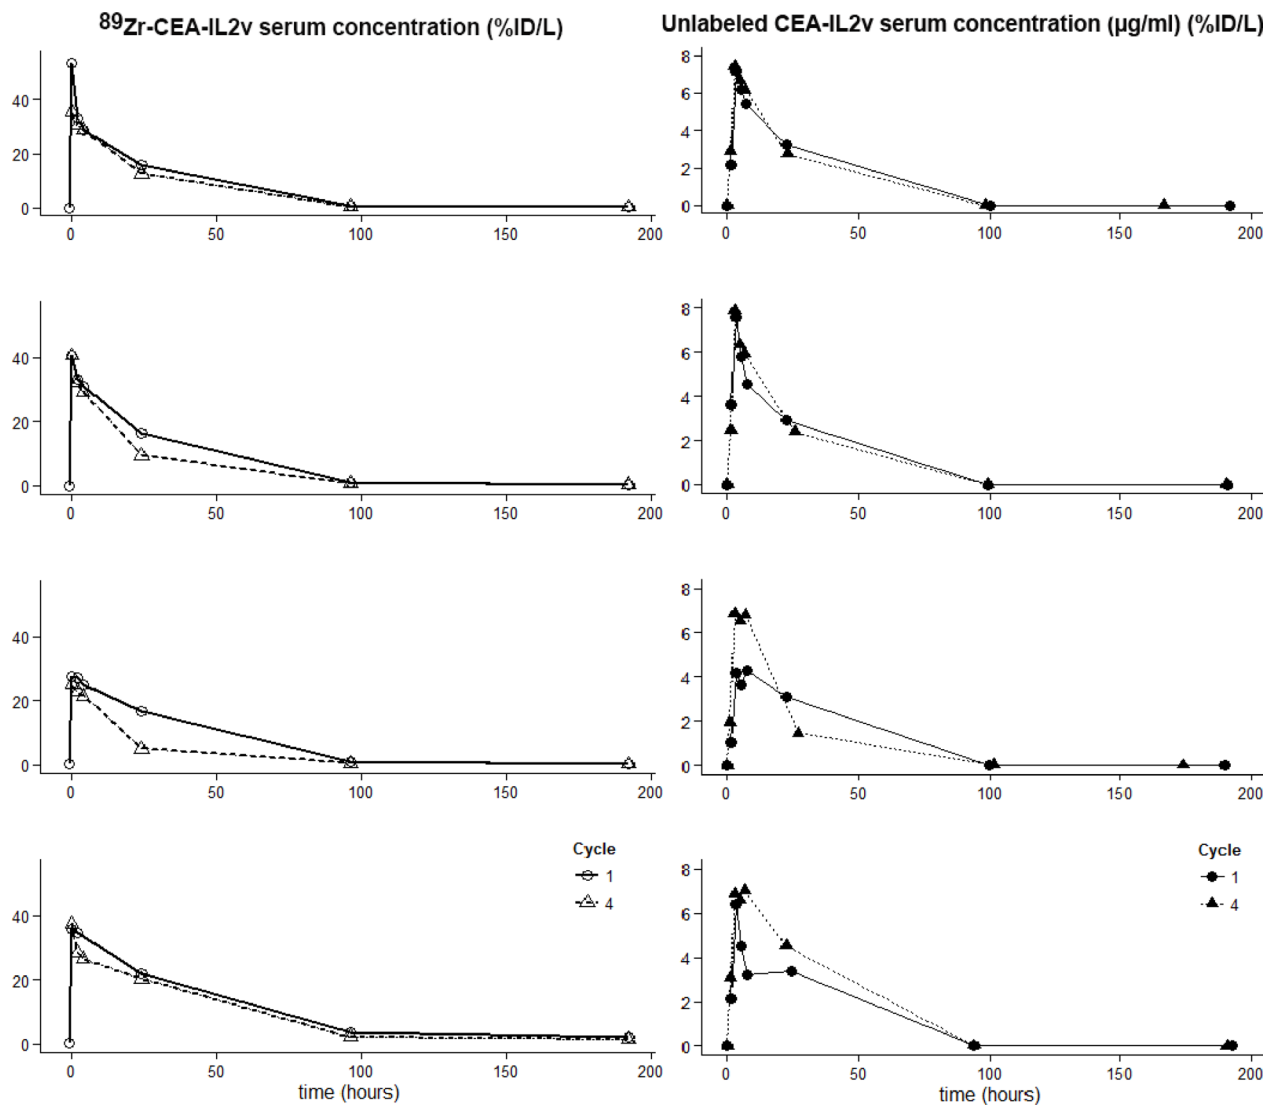

**Supplementary Figure 2:  $^{89}\text{Zr}$ -CEA-IL2v and unlabeled CEA-IL2v exposure over time.** Individual serum concentration–time curves of  $^{89}\text{Zr}$ -CEA-IL2v in % injected dose/mL (%ID/mL; open symbols) and of unlabeled CEA-IL2v ( $\mu\text{g/mL}$ ) (filled symbols) in cycle 1 (solid line) vs. cycle 4 (dashed line) for four patients treated with 20 mg in the first q2w cycle and 30 mg thereafter (cohort E, CEA+ tumors). The patient represented in the third row had detectable anti-drug antibodies at cycle 4.

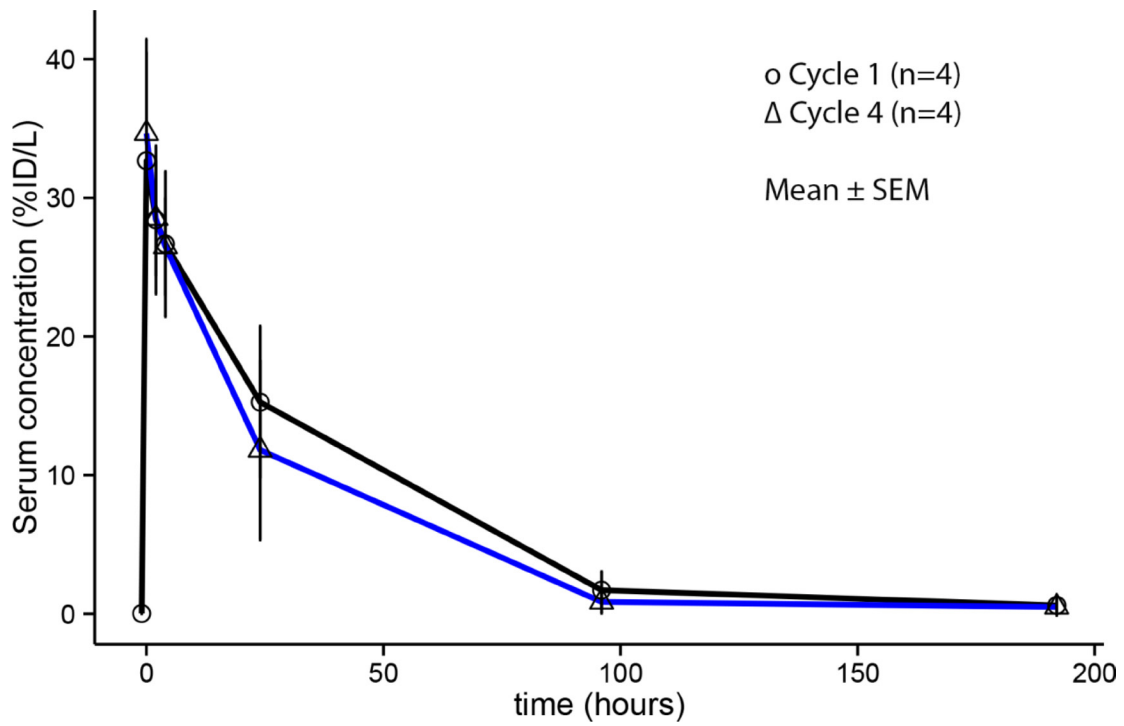

**Supplementary Figure 3:** <sup>89</sup>Zr-CEA-IL2v exposure at cycle 1 and cycle 4 in CEA+ patients from cohort E ( $n = 4$ ). Multiple drug administration induced faster clearance of CEA-IL2v, reducing drug exposure.

**Supplementary Table 1: Patient characteristics**

| <b>Demographic characteristic</b> | <b>Value (N = 17)</b> |
|-----------------------------------|-----------------------|
| <b>Age (years) [range]</b>        | 65 [42–78]            |
| <b>Gender (%)</b>                 |                       |
| <b>Male</b>                       | 58%                   |
| <b>Female</b>                     | 42%                   |
| <b>ECOG PS (%)</b>                |                       |
| <b>0</b>                          | 43%                   |
| <b>1</b>                          | 57%                   |
| <b>Tumor type (n) (%)</b>         |                       |
| <b>CEA+</b>                       | 17                    |
| <b>CRC</b>                        | 11 (46%)              |
| <b>NSCLC</b>                      | 4 (17%)               |
| <b>Salivary gland</b>             | 1 (4.2%)              |
| <b>Gastric</b>                    | 1 (4.2%)              |
| <b>CEA-</b>                       | 7                     |
| <b>RCC</b>                        | 3 (13%)               |
| <b>Melanoma</b>                   | 2 (8.3%)              |
| <b>Ovarian</b>                    | 1 (4.2%)              |
| <b>Pancreatic cancer</b>          | 1 (4.2%)              |

ECOG PS = Eastern Cooperative Oncology Group Performance Status; CRC = colorectal carcinoma; NSCLC = non-small cell lung carcinoma; RCC = renal cell carcinoma.

**Supplementary Table 2: Tumor accumulation; assessment of <sup>89</sup>Zr-accumulation in <sup>18</sup>F-FDG+ lesions per patient**

| Patient/<br>Cohort | Dose cycle<br>1 (mg) | CEA status | No. of<br>FDG<br>+ve<br>lesions | No. of<br><sup>89</sup> Zr +ve<br>lesions<br>day 5 | Accumulation<br>visually<br>confirmed | Consistency                                  |            |
|--------------------|----------------------|------------|---------------------------------|----------------------------------------------------|---------------------------------------|----------------------------------------------|------------|
| 1/A                | 6                    | CEA+       | 7                               | 1                                                  | Yes                                   | Negative on day 2                            |            |
| 2/A                | 6                    | CEA+       | 5                               | 1                                                  | Yes                                   | Positive on day 2                            |            |
| 3/A                | 6                    | CEA+       | 5                               | 0                                                  | No                                    | Consistent lack of accumulation              |            |
| 4/A                | 6                    | CEA+       | 11                              | 7                                                  | Yes                                   | Consistent                                   |            |
| 5/B                | 6                    | CEA-       | 9                               | 2                                                  | No                                    | Both negative on day 1 and 2                 |            |
| 6/B                | 6                    | CEA-       | 6                               | 0                                                  | No                                    | Consistent lack of accumulation              |            |
| 7/B                | 6                    | CEA-       | 7                               | 0                                                  | No                                    | Consistent lack of accumulation              |            |
| 8/C                | 30                   | CEA+       | 7                               | 5 <sup>a</sup>                                     | Yes                                   | Positive on day 2 and 9, day 5 scan not done |            |
| 9/C                | 30                   | CEA+       | 4                               | 4                                                  | Yes                                   | Consistent                                   |            |
| 10/C               | 20                   | CEA+       | 8                               | 2                                                  | Yes                                   | Consistent                                   |            |
| 11/ C              | 30                   | CEA+       | 10                              | 6                                                  | Yes                                   | Consistent                                   |            |
| 12/C               | 30                   | CEA+       | 8                               | 4                                                  | Yes                                   | Positive on day 5 and 9.                     |            |
| 13/ D              | 30                   | CEA-       | 7                               | 2                                                  | Yes                                   | One lesion negative on day 2 (lymph node)    |            |
| 14/D               | 30                   | CEA-       | 2                               | 1                                                  | Yes                                   | Consistent                                   |            |
| 15/D               | 30                   | CEA-       | 8                               | 1                                                  | Yes                                   | Consistent                                   |            |
| 16/D               | 30                   | CEA-       | 6                               | 4                                                  | Yes                                   | Consistent                                   |            |
| 17/E               | 20                   | CEA+       | 4                               | 0                                                  | No                                    | Consistent lack of accumulation              |            |
| 18/E               | 20                   | CEA+       | 33                              | 27                                                 | Yes                                   | Consistent                                   |            |
| 19/E               | 20                   | CEA+       | 7                               | 7                                                  | Yes                                   | Consistent                                   |            |
| 20/E               | 20                   | CEA+       | 2                               | Not<br>evaluable                                   | Not evaluable                         | Note: Lack of FDG+ extrahepatic lesions      |            |
| 21/E               | Cycle 1              | 20         | CEA+                            | 7                                                  | 6                                     | Yes                                          | Consistent |
|                    | Cycle 4              |            |                                 | 7                                                  | 4                                     | Yes                                          | Consistent |
| 22/E               | Cycle 1              | 20         | CEA+                            | 3                                                  | 1                                     | Yes                                          | Consistent |
|                    | Cycle 4              |            |                                 | 3                                                  | 1                                     | Yes                                          | Consistent |
| 23/E               | Cycle 1              | 20         | CEA+                            | 8                                                  | 7                                     | Yes                                          | Consistent |
|                    | Cycle 4              |            |                                 | 8                                                  | 3                                     | Yes                                          | Consistent |
| 24/E               | Cycle 1              | 20         | CEA+                            | 4                                                  | 1                                     | Yes                                          | Consistent |
|                    | Cycle 4              |            |                                 | 4                                                  | 1                                     | Yes                                          | Consistent |

Accumulation was visually confirmed if <sup>89</sup>Zr-positive lesions were visual at the cycle 1, day 5 post-infusion plus one additional scan. <sup>a</sup>Primary evaluation at cycle 1, day 2 post-infusion because day 5 post-infusion scan was not performed.

**Supplementary Table 3: Biodistribution per dose cohort and by CEA status on cycle 1, day 5 post-infusion (non-tumor tissue)**

| Organ<br>(%ID/mL <sub>mean</sub><br>±SD * 10 <sup>-2</sup> ) | 6 mg            |                 | 20 mg <sup>a</sup> | 30 mg                       |                             | Total            |                 | Overall         |
|--------------------------------------------------------------|-----------------|-----------------|--------------------|-----------------------------|-----------------------------|------------------|-----------------|-----------------|
|                                                              | CEA+<br>(n = 4) | CEA-<br>(n = 3) | CEA+<br>(n = 9)    | CEA+<br>(n = 4)             | CEA-<br>(n = 4)             | CEA+<br>(n = 17) | CEA-<br>(n = 7) |                 |
| <b>Spleen</b>                                                | 1.4<br>± 0.23   | 1.6<br>± 0.51   | 1.2<br>± 0.30      | 0.78 <sup>b</sup><br>± 0.54 | 0.94 <sup>b</sup><br>± 0.25 | 1.2<br>± 0.40    | 1.2<br>± 0.49   | 1.2<br>± 0.42   |
| <b>Liver</b>                                                 | 1.1<br>± 0.32   | 0.94<br>± 0.22  | 1.2<br>± 0.27      | 0.90<br>± 0.65              | 1.1<br>± 0.25               | 1.1<br>± 0.39    | 1.01<br>± 0.23  | 1.1<br>± 0.35   |
| <b>Vertebrae</b>                                             | 0.41<br>± 0.11  | 0.46<br>± 0.044 | 0.49<br>± 0.15     | 0.40<br>± 0.28              | 0.42<br>± 0.086             | 0.45<br>± 0.17   | 0.44<br>± 0.068 | 0.44<br>± 0.15  |
| <b>Kidneys</b>                                               | 0.36<br>± 0.058 | 0.39<br>± 0.055 | 0.36<br>± 0.070    | 0.26<br>± 0.18              | 0.30<br>± 0.015             | 0.34<br>± 0.10   | 0.34<br>± 0.059 | 0.34<br>± 0.092 |
| <b>Lung</b>                                                  | 0.10<br>± 0.010 | 0.10<br>± 0.032 | 0.10<br>± 0.030    | 0.072<br>± 0.049            | 0.11<br>± 0.024             | 0.10<br>± 0.033  | 0.11<br>± 0.026 | 0.10<br>± 0.031 |

<sup>a</sup>Including the 20 mg (*n* = 1) and 20–30 mg cohort (*n* = 8).

<sup>b</sup>Significant difference (*p* < 0.05) assessed by One Way Analysis of Variance (ANOVA) comparing %ID/mL<sub>mean</sub> across 6 mg vs. 20 mg vs. 30 mg per organ and for CEA+ vs. CEA- per organ.
